# Supplementary material
Source: Springer Nature journal article supplement (https://www.springermedizin.de/resource/supplementary/12885_2007_1136_MOESM1_ESM.pdf/9471202)

**Laminin**

**Cells**

**Overlay**

**Pipet**

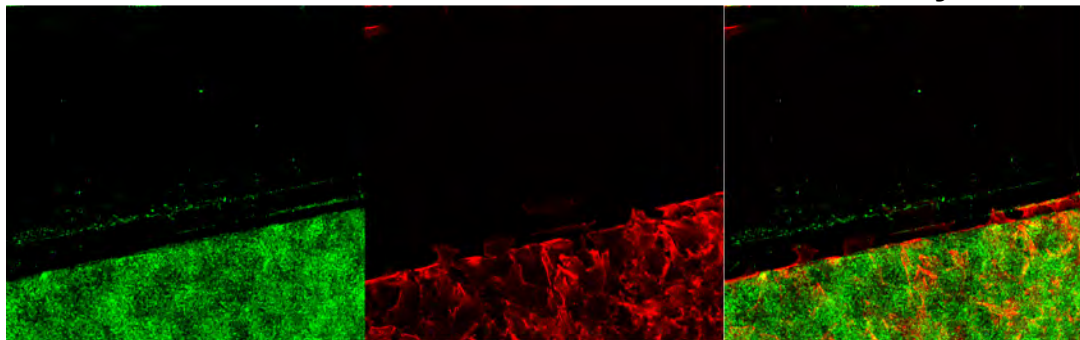

**CIA**

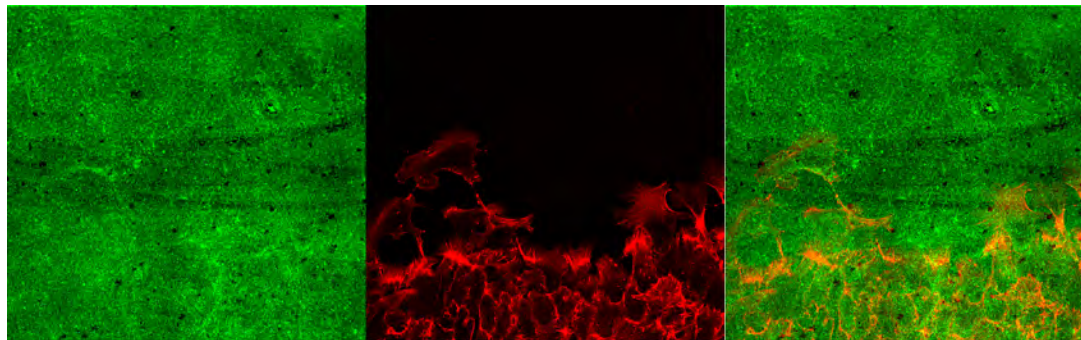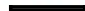

Supplement: MOESM1 [file 9471202]
